# Supplementary material for: Hybrid hexagonal nanorods of metal nitride clusterfullerene and porphyrin using a supramolecular approach
Source: Royal Society of Chemistry journal article supplement (doi:10.1039/c1jm11801c), 2011-01-01
Supplement: c1jm11801c.pdf [file c1jm11801c.pdf]

**Electronic Supplemental Information for:**

**Hybrid Hexagonal Nanorods of Metal Nitride Clusterfullerene and  
Porphyrin Using a Supramolecular Approach**

*Ying Xu, Chenchen He, Fupin Liu, Mingzhi Jiao and Shangfeng Yang\**

Hefei National Laboratory for Physical Sciences at Microscale, CAS Key Laboratory of Materials  
for Energy Conversion & Department of Materials Science and Engineering, University of Science  
and Technology of China (USTC), Hefei 230026, China

**Contents**

- S1.** Size distribution of samples 1, 2, 5, 6
- S2.** SEM image of C<sub>60</sub>-ZnTPyP nanorods
- S3.** TGA data of Sc<sub>3</sub>N@C<sub>80</sub>-ZnTPyP nanorods in comparison to those of Sc<sub>3</sub>N@C<sub>80</sub> and ZnTPyP
- S4.** SEM images of Sc<sub>3</sub>N@C<sub>80</sub>-ZnTPyP nanorods before and after standing for five months
- S5.** Steady-state fluorescence spectra of Sc<sub>3</sub>N@C<sub>80</sub>-ZnTPyP nanorods and ZnTPyP nanotubes in different solvents

### S1. Size distribution of samples 1, 2, 5, 6

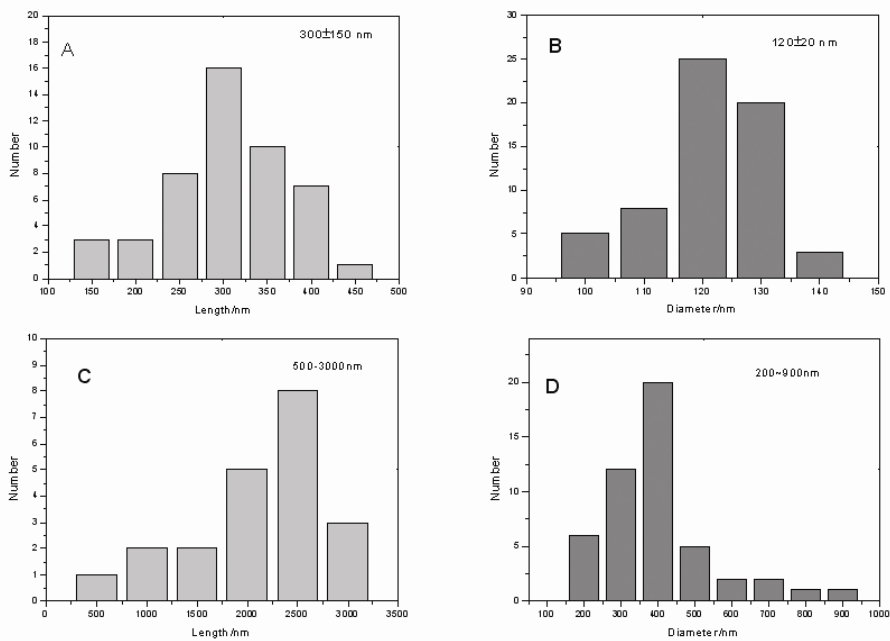

**Figure S1.** Length and diameter distributions of Sc<sub>3</sub>N@C<sub>80</sub>-ZnTPyP nanorods (see Table 1). Sample 2: (A) length; (B) diameter; Sample 1: (C) length; (D) diameter.

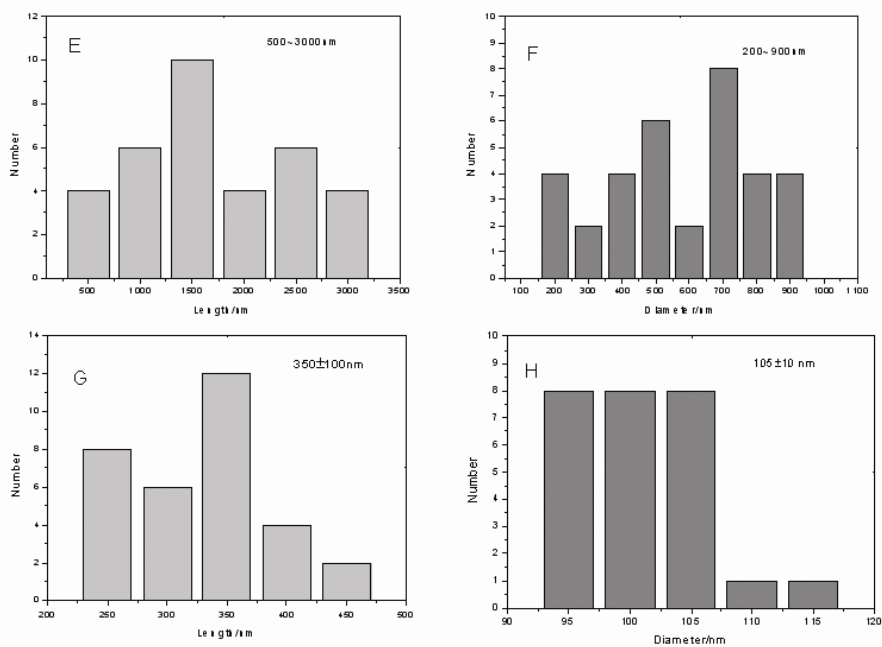

**Figure S2.** Length and diameter distributions of ZnTPyP nanotubes (see Table 1). Sample 6: (E) length; (F) diameter; Sample 5: (G) length; (H) diameter.

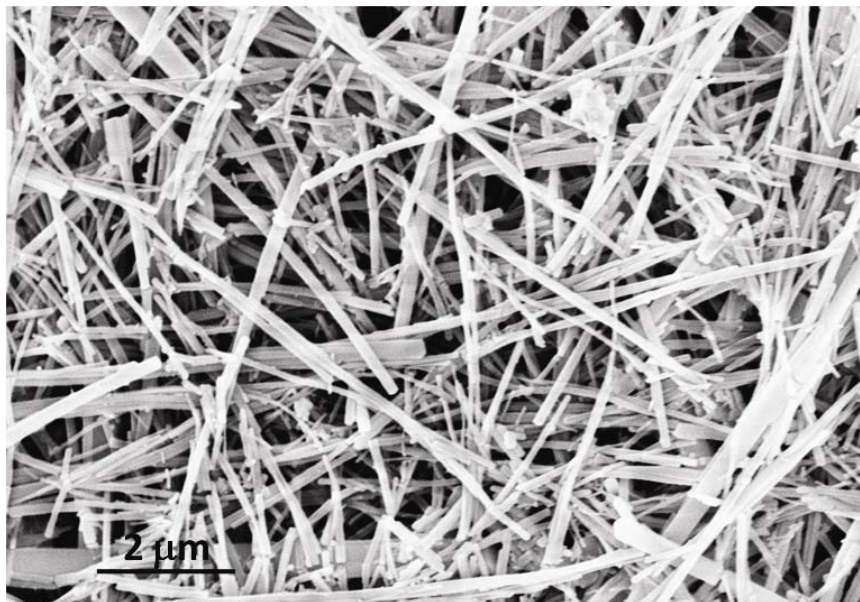

**Figure S3.** SEM image of Sc<sub>3</sub>N@C<sub>80</sub>-ZnTPyP nanorods at a larger scale (sample 4, ZnTPyP:Sc<sub>3</sub>N@C<sub>80</sub>=2:3).

*S2. SEM image of C<sub>60</sub>-ZnTPyP nanorods*

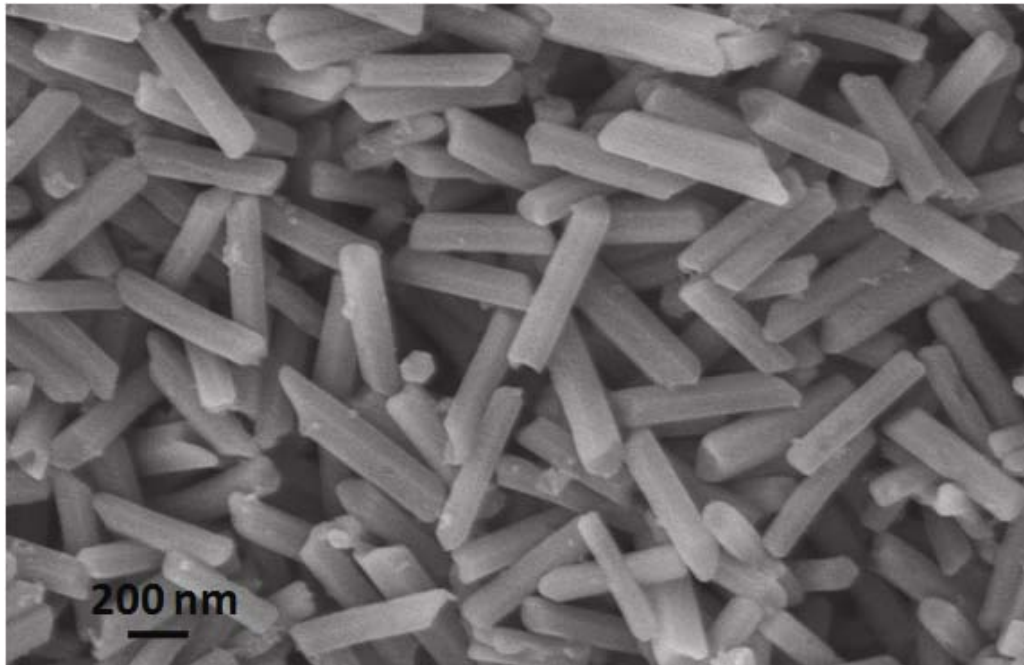

**Figure S4.** SEM image of C<sub>60</sub>-ZnTPyP nanorods (ZnTPyP:C<sub>60</sub>=3:2, water was used as the solvent of CTAB solution, DMF/water=2/15 (v/v)).

**S3. TGA data of  $Sc_3N@C_{80}$ -ZnTPyP nanorods in comparison to those of  $Sc_3N@C_{80}$  and ZnTPyP monomer**

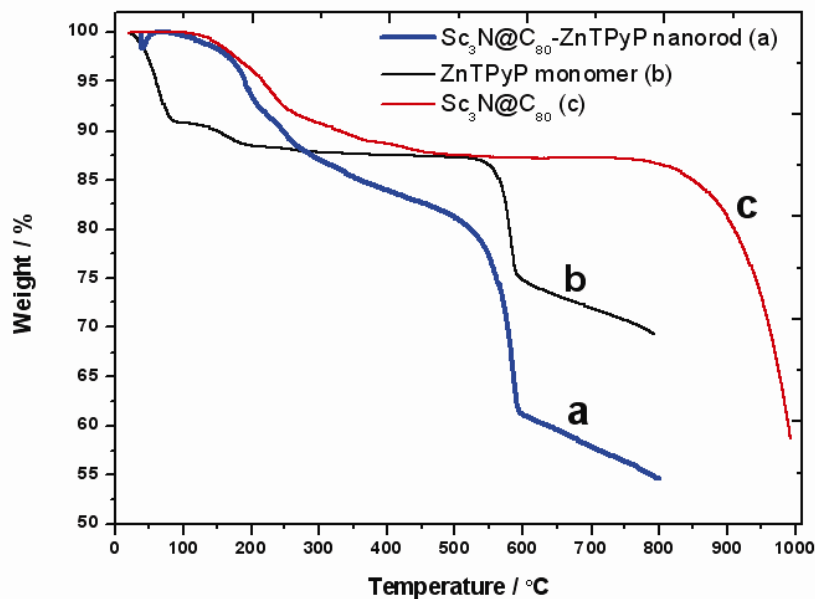

**Figure S5.** Thermal gravimetric analysis (TGA) curves of  $Sc_3N@C_{80}$ -ZnTPyP nanorods (sample 2) (a), ZnTPyP monomer (b) and  $Sc_3N@C_{80}$  (c).

**S4. SEM images of  $Sc_3N@C_{80}$ -ZnTPyP nanorods before and after standing for five months**

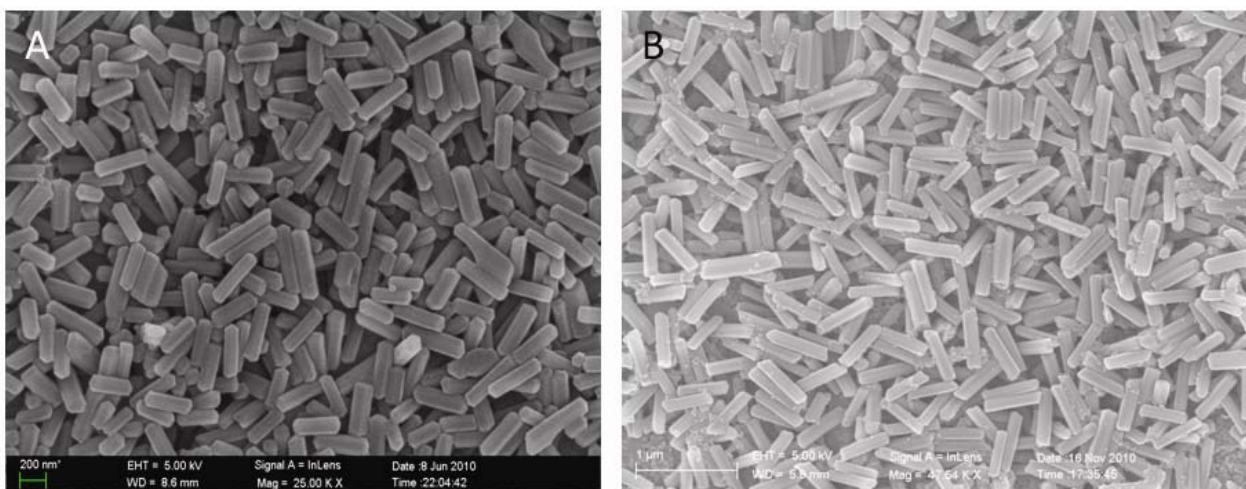

**Figure S6.** SEM images of  $Sc_3N@C_{80}$ -ZnTPyP nanorods (sample 2) before and after standing for five months.

*S5. Steady-state fluorescence spectra of Sc<sub>3</sub>N@C<sub>80</sub>-ZnTPyP nanorods and ZnTPyP nanotubes in different solvents*

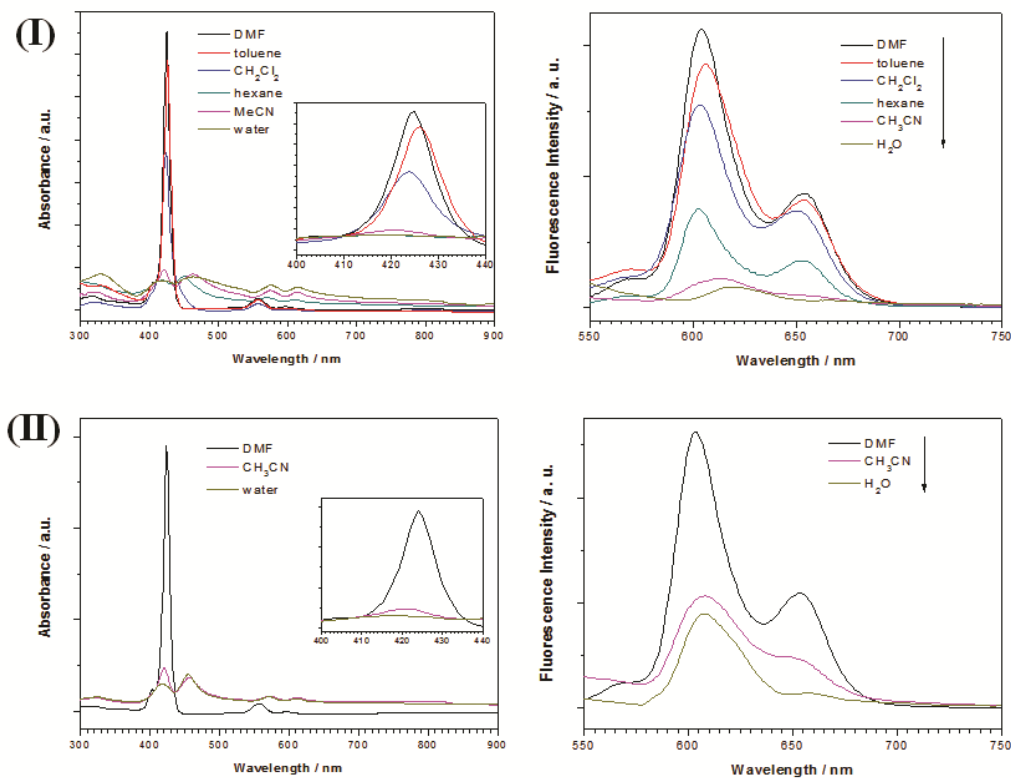

**Figure S7.** (I) UV absorption (left) and steady-state fluorescence spectra (right) of Sc<sub>3</sub>N@C<sub>80</sub>-ZnTPyP nanorods (sample 2) in DMF, toluene, CH<sub>2</sub>Cl<sub>2</sub>, hexane, CH<sub>3</sub>CN, and H<sub>2</sub>O. Excitation wavelength: 410 nm. (II) UV absorption (left) and steady-state fluorescence spectra (right) of ZnTPyP nanotubes (sample 5) in DMF, CH<sub>3</sub>CN and H<sub>2</sub>O. Excitation wavelength: 410 nm. Sample concentrations were adjusted to keep the same optical absorbance at the excitation wavelength of 410 nm.
